# Supplementary material for: Sera of Neuromyelitis Optica Patients Increase BID-Mediated Apoptosis in Astrocytes
Source: MDPI journal article supplement (doi:10.3390/ijms23137117), 2022-06-27
Supplement: s1 [file s1]

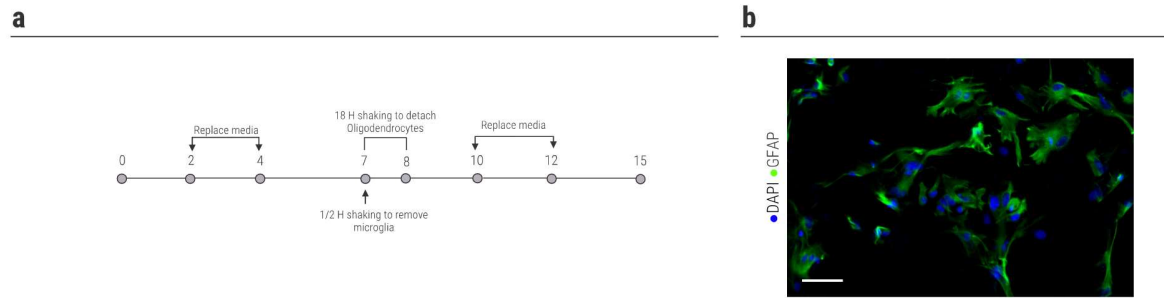

**Figure S1.** Astrocytes' purity. **(a)** Time course experiments of astrocytes isolation. Astrocytes are isolated from P0 to P1 neonatal mice cortices, cultured in mixed glial culture media and maintained in culture until 7 days in vitro (DIV). Culture media is replaced after 2 DIV and every 2 days thereafter. After 7 DIV, first microglia are detached by 1/2 h shaking and after oligodendrocytes are detached by 18 h shaking. After detachment of microglia and oligodendrocytes, astrocytes are cultured in flasks for 7 days, and culture media is replaced every 2 days, **(b)** Representative immunofluorescence staining of mouse primary astrocytes.
