# Supplementary material for: Sera of Neuromyelitis Optica Patients Increase BID-Mediated Apoptosis in Astrocytes
Source: Int J Mol Sci. 2022 Jun 27;23(13):7117. doi: 10.3390/ijms23137117 (PMC9266359; doi:10.3390/ijms23137117)
Supplement: Supplementary file 1 [file ijms-23-07117-s001.zip › Table S1.xlsx]

## Sheet: Sheet1
Gene	HC1	HC2	HC3	HC4	NMO1	NMO2	NMO3	NMO4
ADA	277.84	264.14	315.68	287.55	330.89	346.28	383.34	341.7
AHR	4296.85	4582.86	3875.37	3616.47	3429.07	2819.55	3426.55	3275.05
ARG2	55.8	59.91	41.51	61.67	25.81	31.14	21.22	29.77
ATG7	1012.18	1065.21	1062.18	1057.08	1263.59	1248.8	1119.23	1150.32
BAX	5727.45	5628.65	6622.89	7102.72	7031.58	7673.68	7853.48	6961.84
BCAP31	6813.89	6765.99	7407.4	7582.51	7819.82	8181.86	7941.52	7900.03
BCL6	583.95	512.38	649.76	620.9	842.69	644.92	715.57	687.22
BID	63.73	72.24	82.98	75.69	129.16	121.89	144.14	130.54
C7	12.98	3.57	1	1.56	24.56	19.59	12.91	12.97
CCL26	517.33	526.47	461.99	547.69	410.59	504.68	434.84	396.88
CCR1	25.66	19.42	15.01	24.28	33.28	60.84	37.83	41.76
CD276	7134.26	7908.62	7122.85	6694.59	6697.85	5969.29	6135.87	5927.67
CD36	22.49	14.14	17.32	13.38	3.39	1.65	1.66	1.2
CD59	38474.3	37632.6	40472.1	43258.2	44577.1	45993.6	48358.7	46515.9
CDKN1A	9051.78	8107.56	11112.2	11726.1	12074.8	14001.2	13549.5	13060.1
CR2	1	1.81	6.95	1.56	13.36	16.29	17.89	4.57
CSF3R	157.3	128.58	233.89	201.87	283.58	227.49	250.45	286.51
CX3CL1	95.45	74	56.48	71.02	60.68	39.39	37.83	42.96
FADD	169.99	147.94	229.28	206.54	193.92	349.58	351.78	290.11
FN1	300696	300323	334538	321356	338926	373664	369753	370362
FOXP3	12.98	10.62	9.25	2.48	25.81	27.84	19.55	14.17
FYN	2239.77	2431.43	1854.76	1895.15	1933.53	1511.14	1529.53	1653.01
GATA3	12.98	1	16.16	1.56	27.05	14.64	16.23	26.17
GBP1	2327	2144.45	2545.96	2719.2	3219.87	3317.83	3273.73	3044.7
GPI	5037.53	5082.87	5302.69	5294.17	5685.46	5954.44	6026.23	6076.43
HFE	95.45	107.45	130.21	123.98	132.9	151.59	155.77	159.34
HLA-A	4788.52	4336.38	6768.04	6616.7	7361.57	9168.53	8468.11	8251.55
HLA-B	2690.2	2463.12	2859.3	3075.93	3350.62	3568.62	3341.83	2993.11
HLA-C	3713.19	3361.02	4113.83	4401.58	4706.7	5378.61	5262.11	5060.26
IFNGR1	2815.5	2896.22	3087.4	3065.02	4099.02	3076.94	3589.34	3519.8
IGF2R	2143.02	2188.46	2254.5	1949.67	2073	1686.04	1664.08	1804.17
IKBKAP	1540.33	1757.12	1445.8	1393.55	1340.79	1263.65	1321.89	1369.87
IKBKG	907.5	857.46	960.8	965.17	1015.78	1064.01	1105.94	1143.12
IL15	112.9	119.77	157.86	159.81	193.92	181.29	169.06	198.93
IL17F	19.32	15.9	19.62	5.59	28.3	31.14	41.15	32.17
IL1RL1	44.7	70.48	28.84	35.19	13.36	21.24	19.55	24.97
IRAK4	273.08	274.7	402.08	357.64	390.67	479.93	527.86	473.67
IRF3	133.51	107.45	146.34	141.12	155.31	219.24	154.11	176.13
ITGAE	2071.65	1952.55	2188.84	2381.17	2292.16	3030.74	2898.31	2685.98
ITGAM	32.01	33.5	26.53	22.73	34.53	59.19	47.79	48.96
ITGB1	113197	109023	122731	125640	132803	138186	131638	123143
ITGB2	6.63	15.9	3.49	16.5	4.64	1.65	1.66	1
JAK1	3838.49	3658.56	3800.49	3974.75	4304.48	4390.29	4576.06	4156.86
LITAF	1037.55	1049.36	1402.02	1395.11	1525.09	1506.19	1479.69	1572.63
LY96	455.48	452.52	402.08	514.98	385.69	367.73	409.92	363.29
MALT1	1367.45	1294.09	1441.19	1398.22	1726.82	1648.09	1542.82	1753.79
MBP	203.3	193.72	167.08	195.64	131.65	115.29	114.24	178.53
MYD88	1427.72	1470.14	1566.76	1670.83	1845.12	1692.64	1728.87	1721.39
NFIL3	679.11	618.02	662.44	726.83	809.07	689.47	787	786.8
NOD1	124	102.17	167.08	116.19	171.5	176.34	197.3	207.33
NT5E	7242.11	7170.93	7875.11	7881.6	10038.9	10041.4	8164.12	8289.95
PDCD1LG2	2398.37	2301.14	2762.53	2893.67	3486.35	3476.22	3366.75	3030.3
PDGFRB	1564.12	1485.99	1619.75	1441.84	1332.07	1303.25	1351.79	1333.88
PECAM1	119.24	107.45	130.21	114.63	129.16	126.84	132.51	141.34
PLAU	8311.1	8325.88	7019.17	7947.03	6189.79	6677.11	5014.6	5169.43
PTPN2	652.15	679.64	745.38	804.72	897.48	877.56	914.91	879.18
PYCARD	184.27	153.22	175.14	208.1	200.14	210.99	272.05	231.32
RAF1	2463.4	2443.75	2309.8	2293.93	2186.31	1958.28	2212.26	2142.5
SKI	2376.16	2246.56	2971.05	2638.2	3243.53	3477.87	3303.63	3391.42
SLAMF1	20.91	17.66	39.2	21.17	38.26	49.29	37.83	40.56
SLC2A1	796.48	693.72	887.08	838.99	896.24	1266.95	1105.94	1145.52
SPP1	1088.31	933.16	1135.91	1317.22	1302.19	1641.49	1399.96	1402.26
TAP2	390.45	360.97	588.71	499.4	658.39	644.92	693.98	657.23
TAPBP	2463.4	2345.16	2988.33	2876.53	3394.21	3327.73	3044.49	3044.7
TGFB1	2801.22	2607.48	3699.11	3306.47	3661.93	4971.07	4207.29	4096.87
TLR3	200.13	213.08	201.64	239.26	211.35	141.69	129.19	166.54
TLR4	1323.36	1346.15	1132.52	1073.54	1632.31	1787.05	1453.86	1515.06
TNFSF12	771.1	714.85	591.01	650.5	550.06	494.78	492.98	465.27
TNFSF15	22.49	15.9	20.77	21.17	15.85	6.39	1.66	1.2
TOLLIP	1123.2	1123.31	1145.12	1175.47	1267.32	1199.3	1152.45	1255.9
TP53	1728.59	1913.25	1956.63	2094.17	2088.61	2158.41	2412.06	2238.18
TRAF6	745.72	707.81	764.96	733.06	770.47	808.27	823.55	750.81
XCR1	1.59	1.76	9.25	1.56	13.36	9.69	9.59	9.37
